# Supplementary material
Source: MDPI journal article supplement (https://www.mdpi.com/search?q=ijerph-16-04982)
Supplement: s001 [file ijerph-16-04982-s001.pdf]

**Supplementary materials:**

**Document S1. Social Emotional Health Survey-Secondary, Spanish Language Version**

Marca la respuesta que consideres verdadera con un círculo. Por favor seleccione la respuesta apropiada para cada concepto.

**1= Para nada cierto // 2=Un poco cierto // 3=Más o menos cierto // 4=Muy cierto.**

|                                                                                                         |   |   |   |   |
|---------------------------------------------------------------------------------------------------------|---|---|---|---|
| 1. Puedo solucionar mis problemas.                                                                      | 1 | 2 | 3 | 4 |
| 2. Puedo hacer casi todo si lo intento.                                                                 | 1 | 2 | 3 | 4 |
| 3. Hay muchas cosas que hago bien.                                                                      | 1 | 2 | 3 | 4 |
| 4. Mi vida tiene un propósito.                                                                          | 1 | 2 | 3 | 4 |
| 5. Entiendo mis estados de ánimo y sentimientos.                                                        | 1 | 2 | 3 | 4 |
| 6. Entiendo por qué hago lo que hago.                                                                   | 1 | 2 | 3 | 4 |
| 7. Cuando no entiendo algo, le pregunto al profesor/a una y otra vez hasta entenderlo.                  | 1 | 2 | 3 | 4 |
| 8. Intento responder todas las preguntas que se hacen en clase                                          | 1 | 2 | 3 | 4 |
| 9. Cuando intento resolver un problema de matemáticas, no me detengo hasta encontrar una solución.      | 1 | 2 | 3 | 4 |
| 10. En mi escuela hay un/a profesor/a o algún otro adulto/a que quiere que lo haga lo mejor que pueda.  | 1 | 2 | 3 | 4 |
| 11. En mi escuela hay un/a profesor/a o algún otro adulto/a que me escucha cuando tengo algo que decir. | 1 | 2 | 3 | 4 |
| 12. En mi escuela hay un/a profesor/a o algún otro adulto/a que cree que tendré éxito.                  | 1 | 2 | 3 | 4 |
| 13. Los miembros de mi familia realmente se ayudan y se apoyan unos/as a otros/as.                      | 1 | 2 | 3 | 4 |
| 14. Hay una sensación de unidad en mi familia.                                                          | 1 | 2 | 3 | 4 |
| 15. Mis familiares se llevan bien entre ellos/as.                                                       | 1 | 2 | 3 | 4 |
| 16. Tengo un/a amigo/a de mi edad que realmente se preocupa por mí.                                     | 1 | 2 | 3 | 4 |
| 17. Tengo un/a amigo/a de mi edad que habla conmigo sobre mis problemas.                                | 1 | 2 | 3 | 4 |
| 18. Tengo un/a amigo/a de mi edad que me ayuda cuando estoy pasando un mal rato.                        | 1 | 2 | 3 | 4 |
| 19. Me hago responsable de mis acciones.                                                                | 1 | 2 | 3 | 4 |
| 20. Admito cuando cometo algún error.                                                                   | 1 | 2 | 3 | 4 |
| 21. Puedo tolerar cuando me dicen que “no”.                                                             | 1 | 2 | 3 | 4 |
| 22. Me siento mal cuando le hieren los sentimientos a alguien.                                          | 1 | 2 | 3 | 4 |
| 23. Trato de entender por lo que pasan otras personas.                                                  | 1 | 2 | 3 | 4 |
| 24. Trato de entender cómo piensan y sienten otras personas.                                            | 1 | 2 | 3 | 4 |
| 25. Puedo esperar por lo que quiero.                                                                    | 1 | 2 | 3 | 4 |
| 26. No molesto a los demás cuando están ocupados.                                                       | 1 | 2 | 3 | 4 |
| 27. Pienso antes de actuar.                                                                             | 1 | 2 | 3 | 4 |
| 28. Espero divertirme mucho cada día.                                                                   | 1 | 2 | 3 | 4 |
| 29. Usualmente espero tener un buen día.                                                                | 1 | 2 | 3 | 4 |
| 30. En general espero que me pasen más cosas buenas que malas.                                          | 1 | 2 | 3 | 4 |

**1=Para nada // 2=Muy poco // 3=Algo // 4=Mucho //5=Extremadamente.**

|                                                                                                        |   |   |   |   |   |
|--------------------------------------------------------------------------------------------------------|---|---|---|---|---|
| 31. ¿Cómo de lleno/a de energía te sientes ahora?                                                      | 1 | 2 | 3 | 4 | 5 |
| 32. ¿Cómo de activo/a te sientes ahora?                                                                | 1 | 2 | 3 | 4 | 5 |
| 33. ¿Cómo de animado/a te sientes ahora?                                                               | 1 | 2 | 3 | 4 | 5 |
| 34. ¿Cómo de satisfecho/a te has sentido desde el día de ayer?                                         | 1 | 2 | 3 | 4 | 5 |
| 35. ¿Cómo de agradecido/a te has sentido desde el día de ayer?                                         | 1 | 2 | 3 | 4 | 5 |
| 36. ¿Cómo de apreciativo/a (que aprecia o valora lo que le rodea) te has sentido desde el día de ayer? | 1 | 2 | 3 | 4 | 5 |

**Document S2.** Correction syntax for the SEHS-S

**12 FIRST-ORDER SUBSCALES:**

|                             |                                 |
|-----------------------------|---------------------------------|
| <b>Self-Efficacy</b>        | SEHS-S1 + SEHS-S2 + SEHS-S3.    |
| <b>Self-Awareness</b>       | SEHS-S4 + SEHS-S5 + SEHS-S6.    |
| <b>Persistence</b>          | SEHS-S7 + SEHS-S8 + SEHS-S9.    |
| <b>Teacher Support</b>      | SEHS-S10 + SEHS-S11 + SEHS-S12. |
| <b>Family Coherence</b>     | SEHS-S13 + SEHS-S14 + SEHS-S15. |
| <b>Peer Support</b>         | SEHS-S16 + SEHS-S17 + SEHS-S18. |
| <b>Emotional Regulation</b> | SEHS-S19 + SEHS-S21 + SEHS-S21. |
| <b>Empathy</b>              | SEHS-S22 + SEHS-S23 + SEHS-S24. |
| <b>Self-Control</b>         | SEHS-S25 + SEHS-S26 + SEHS-S27. |
| <b>Optimism</b>             | SEHS-S28 + SEHS-S29 + SEHS-S30. |
| <b>Zest</b>                 | SEHS-S31 + SEHS-S32 + SEHS-S33. |
| <b>Gratitude</b>            | SEHS-S34 + SEHS-S35 + SEHS-S36. |

**FOUR SECOND-ORDER FACTORS:**

|                             |                                                    |
|-----------------------------|----------------------------------------------------|
| <b>Belief in self</b>       | Self-Efficacy + Self-Awareness + Persistence.      |
| <b>Belief in others</b>     | Teacher Support + Family Coherence + Peer Support. |
| <b>Emotional Competence</b> | Emotional Regulation + Empathy + Self-Control.     |
| <b>Engaged living</b>       | Optimism + Zest + Gratitude.                       |

**THIRD-ORDER GENERAL FACTOR: COVITALITY:**

|                   |                                                                           |
|-------------------|---------------------------------------------------------------------------|
| <b>Covitality</b> | Belief-in-self + Belief-in-other + Emotional Competence + Engaged Living. |
|-------------------|---------------------------------------------------------------------------|

## Document S3. Description of Covitality indicators

### Covitality Model

| Covitality Indicator        | Definition                                                                                                                                             |
|-----------------------------|--------------------------------------------------------------------------------------------------------------------------------------------------------|
| <b>BELIEF IN SELF</b>       |                                                                                                                                                        |
| <b>Self-Efficacy</b>        | Belief in one's ability to succeed in specific situations or when performing a task or is confidence in one's ability to achieve intended results [1]. |
| <b>Self-Awareness</b>       | Recognition of one's own emotions and values, and their impact on behavior, as well as accurate self-assessment of strengths and challenges [2].       |
| <b>Persistence</b>          | Working with dedication to achieve one's own objectives, maintaining interest in the face of difficulty [3].                                           |
| <b>BELIEF IN OTHERS</b>     |                                                                                                                                                        |
| <b>Teacher Support</b>      | Assess the careful and helpful nature of one's relationships with teachers [4].                                                                        |
| <b>Family Coherence</b>     | Feeling that the family is united and supportive [4].                                                                                                  |
| <b>Peer Support</b>         | Assess the careful and helpful nature of one's relationships with [4].                                                                                 |
| <b>EMOTIONAL COMPETENCE</b> |                                                                                                                                                        |
| <b>Emotional Regulation</b> | The ability to manage our emotions and our efforts to control what emotions we feel, when we feel them, and how we experience and express them [5].    |
| <b>Empathy</b>              | Ability to share another person's feelings or motivations and understand their point of view [6].                                                      |
| <b>Self-Control</b>         | Ability to control one's own behaviors or thoughts in difficult situations in order to obtain a reward or avoid punishment [7].                        |
| <b>ENGAGED LIVING</b>       |                                                                                                                                                        |
| <b>Optimism</b>             | Tendency to believe that good things will come and to have a positive vision of the future [8].                                                        |
| <b>Zest</b>                 | Approach life with enthusiasm and energy [9].                                                                                                          |
| <b>Gratitude</b>            | Sensing thankfulness that arises in response to receiving any kind of personal benefit as a result of any transactional means [10].                    |

## References

1. Bandura, A.; Barbaranelli, C.; Capara, G.V.; Pastorelli, C. Multifaceted impact of self-efficacy beliefs on academic functioning. *Child Dev.* **1996**, *67*, 1206–1222. doi:10.2307/1131888.
2. Abrams, D.; Brown, R. Self-Consciousness and social identity: Self-regulation as a group member. *Soc. Psychol. Q.* **1989**, *52*, 311–318. doi:10.2307/2786994.
3. Duckworth, A.L.; Peterson, C.; Matthews, M.D.; Kelly, D.R. Grit: Perseverance and passion for long-term goals. *Pers. Process. Individ. Differ.* **2007**, *92*, 1087–1101. doi:10.1037/0022-3514.92.6.1087.
4. Farmer, T.W.; Farmer, E. Social relationships of students with exceptionalities in mainstream classrooms: Social networks and homophily. *Except. Child.* **1996**, *62*, 431–450. doi:10.1177/001440299606200504.
5. Fry, M.D.; Guivernau, M.; Kim, M.S.; Newton, M.; Gano-Overway, L.A.; Magyar, M. Youth perceptions of a caring climate, emotional regulation, and psychological well-being. *Sport Exerc. Perform. Psychol.* **2012**, *1*, 44–57. doi:10.1037/a0025454.
6. Garaigordobil, M. Effects of a psychological intervention on factors of emotional development during adolescence. *Eur. J. Psychol. Assess.* **2004**, *20*, 66–80. doi:10.1027/1015-5759.20.1.66.
7. Hofer, J.; Busch, H.; Kartner, J. Self-regulation and well-being: The influence of identity and motives. *Eur. J. Personal.* **2011**, *25*, 211–224. doi:10.1002/per.789.
8. Utsey, S.O.; Hook, J.N.; Fischer, N.; Belvet, B. Cultural orientation, ego resilience, and optimism as predictors of subjective well-being in African Americans. *J. Posit. Psychol.* **2008**, *3*, 202–210. doi:10.1080/17439760801999610.
9. Park, N.; Peterson, C. Moral competence and character strengths among adolescents: The development and validation of the Values in Action Inventory of Strengths for Youth. *J. Adolesc.* **2006**, *29*, 891–909. doi:10.1016/j.adolescence.2006.04.011.
10. Emmons, R.A. *Thanks!*; Houghton Mifflin: New York, NY, USA, 2007.
